# Supplementary material for: Depression history modulates effects of subthalamic nucleus topography on neuropsychological outcomes of deep brain stimulation for Parkinson’s disease
Source: Springer Nature journal article supplement (doi:10.1038/s41398-022-01978-y), 2022-05-27
Supplement: 41398_2022_1978_MOESM1_ESM.pdf [file 41398_2022_1978_MOESM1_ESM.pdf]

Total STN-DBS Patients (n=157)

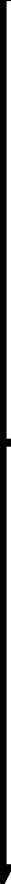

Included in Study (n=42)

- Excluded (n=115)
- Did not return for neuropsychological testing follow-up (n=101)
  - Insufficiently comparable neuropsychological testing battery (n=6)
  - Unknown stimulation settings at the time of neuropsychological follow-up (n=3)
  - Unilateral implant or stimulation (n=4)
  - Patient unwilling to participate in study (n=1)
