# Supplementary material for: Depression history modulates effects of subthalamic nucleus topography on neuropsychological outcomes of deep brain stimulation for Parkinson’s disease
Source: Springer Nature journal article supplement (doi:10.1038/s41398-022-01978-y), 2022-05-27

Anxiety

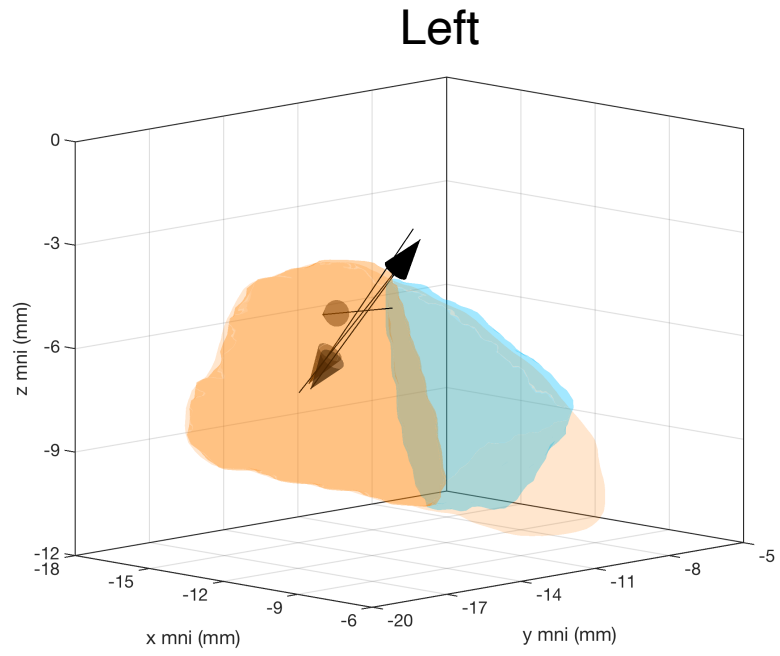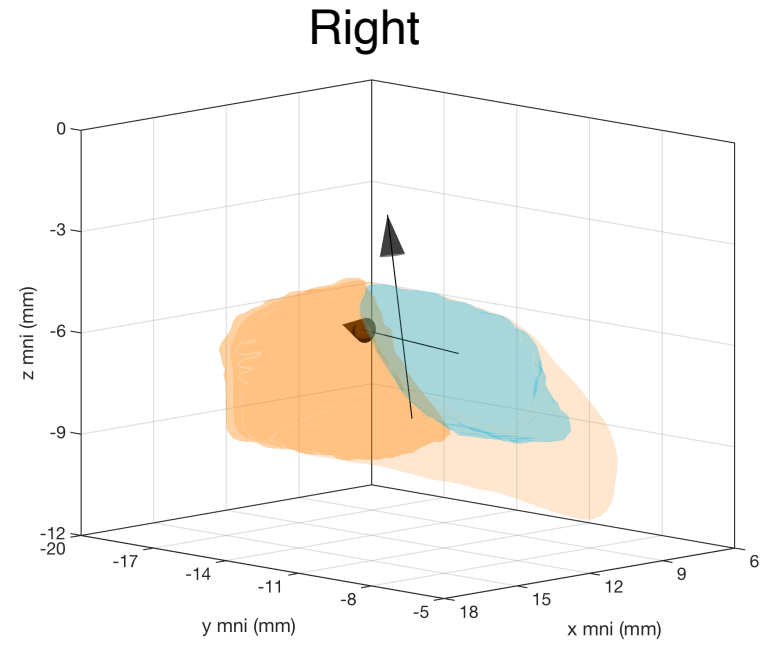

No Anxiety

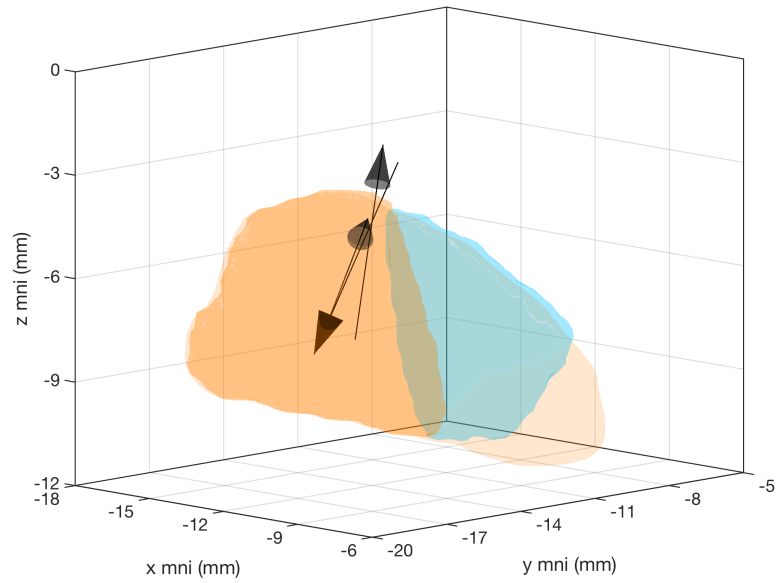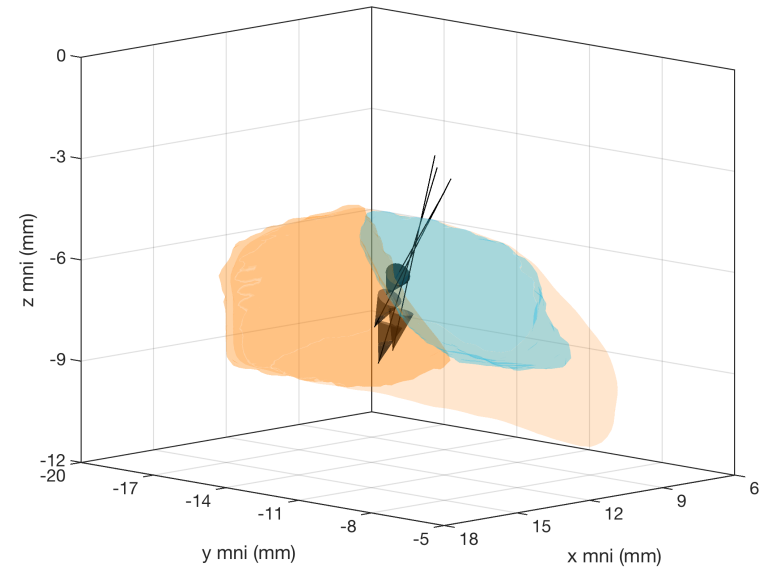

Supplement: 41398_2022_1978_MOESM2_ESM.pdf [file 41398_2022_1978_MOESM2_ESM.pdf]
